# Supplementary material for: Ibrutinib increases the risk of hypertension and atrial fibrillation: Systematic review and meta-analysis
Source: PubMed Central journal article supplement (PMC6382095; doi:10.1371/journal.pone.0211228), 2019-02-20
Supplement: pone.0211228.s001.pdf [file pone.0211228.s001.pdf]

# SUPPLEMENTARY

## DATA

### PLOS ONE

*Ibrutinib increases the risk of hypertension and atrial fibrillation:  
systematic review and meta-analysis.*

Daniel Caldeira, Daniela Alves, João Costa, Joaquim J. Ferreira, Fausto J. Pinto.

**Corresponding author:** Prof. Daniel Caldeira, Faculdade de Medicina da Universidade de Lisboa, Av. Prof. Egas Moniz, Lisboa, 1649-028, Portugal. E-mail: dgcaldeira@hotmail.com

**Phone number:** (+351) 21 797 34 53; **Fax number:** (+351) 21 781 96 88.

# Contents

|                                                                                                           |    |
|-----------------------------------------------------------------------------------------------------------|----|
| Search Strategies .....                                                                                   | 3  |
| Figure A: Overview of trials' risk of bias. ....                                                          | 4  |
| Figure B: Funnel plot for publication bias evaluation – hypertension. ....                                | 5  |
| Figure C: Funnel plot for publication bias evaluation – atrial fibrillation. ....                         | 6  |
| Figure D: Forest plot of risk associated with ibrutinib according to the controls used in the trials..... | 7  |
| Figure E: Meta-regression evaluating the association of hypertension risk and follow-up .....             | 8  |
| Figure F: Meta-regression evaluating the association of atrial fibrillation risk and follow-up.....       | 9  |
| Figure G: Forest plot with meta-analyses using the Mantel-Haenszel method and random effects models. .... | 10 |

## Search Strategies

### Ovid MEDLINE

| #  | Searches                        |
|----|---------------------------------|
| 1  | ibrutinib.af.                   |
| 2  | randomized controlled trial.pt. |
| 3  | controlled clinical trial.pt.   |
| 4  | randomized.ab.                  |
| 5  | placebo.ab.                     |
| 6  | randomly.ab.                    |
| 7  | clinical trials as topic.sh.    |
| 8  | trial.ti.                       |
| 9  | 2 or 3 or 4 or 5 or 6 or 7 or 8 |
| 10 | exp animals/ not humans.sh.     |
| 11 | 9 not 10                        |
| 12 | 1 and 11                        |

### EMBASE

| # | Searches                                                            |
|---|---------------------------------------------------------------------|
| 1 | ibrutinib.                                                          |
| 2 | random*:ab,ti OR placebo*:de,ab,ti OR (double NEXT/1 blind*):ab,ti. |
| 3 | 1 and 2                                                             |

### Ovid CENTRAL

| # | Searches      |
|---|---------------|
| 1 | ibrutinib.af. |

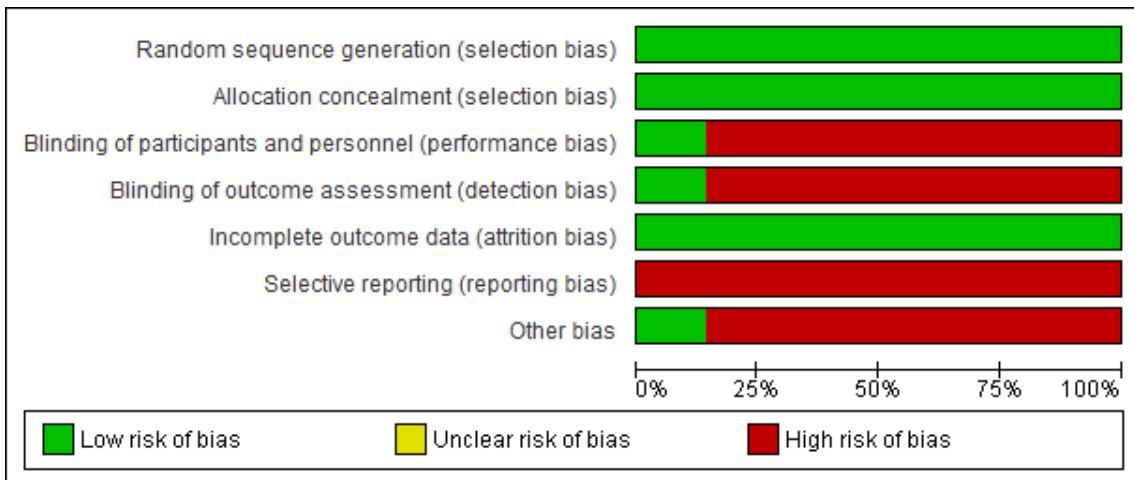

Figure A: Overview of trials' risk of bias.

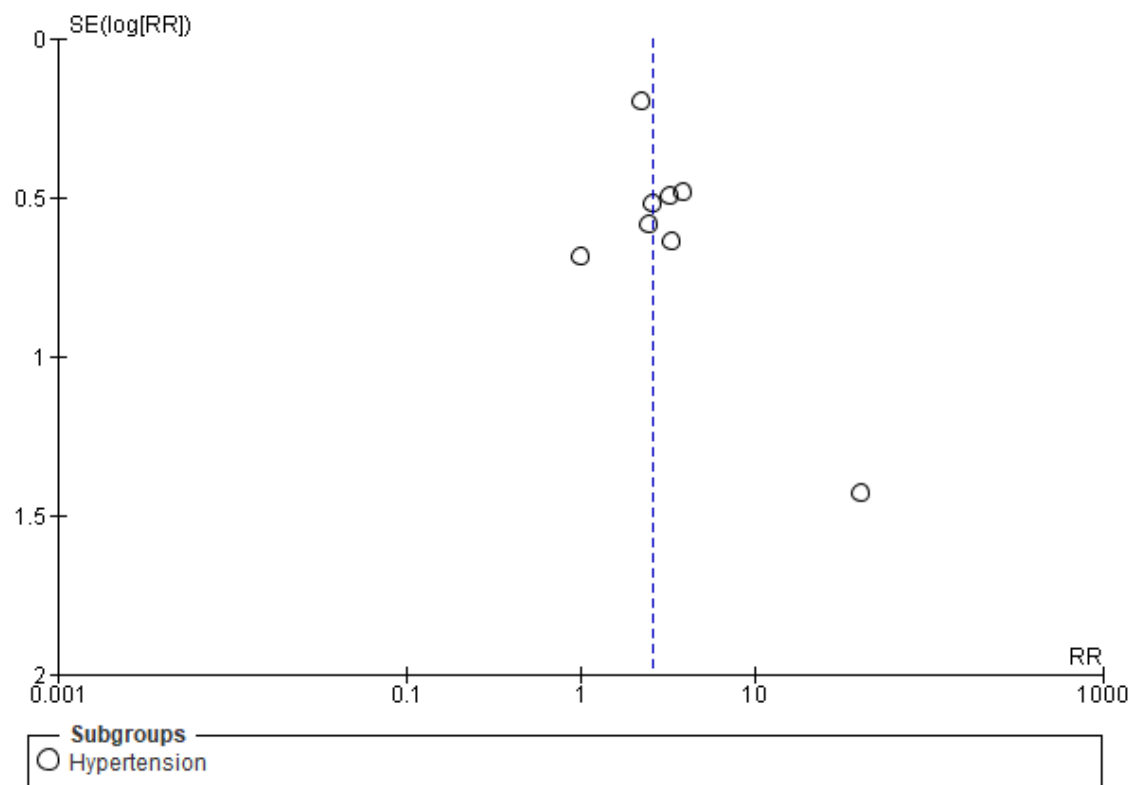

Figure B: Funnel plot for publication bias evaluation – hypertension.

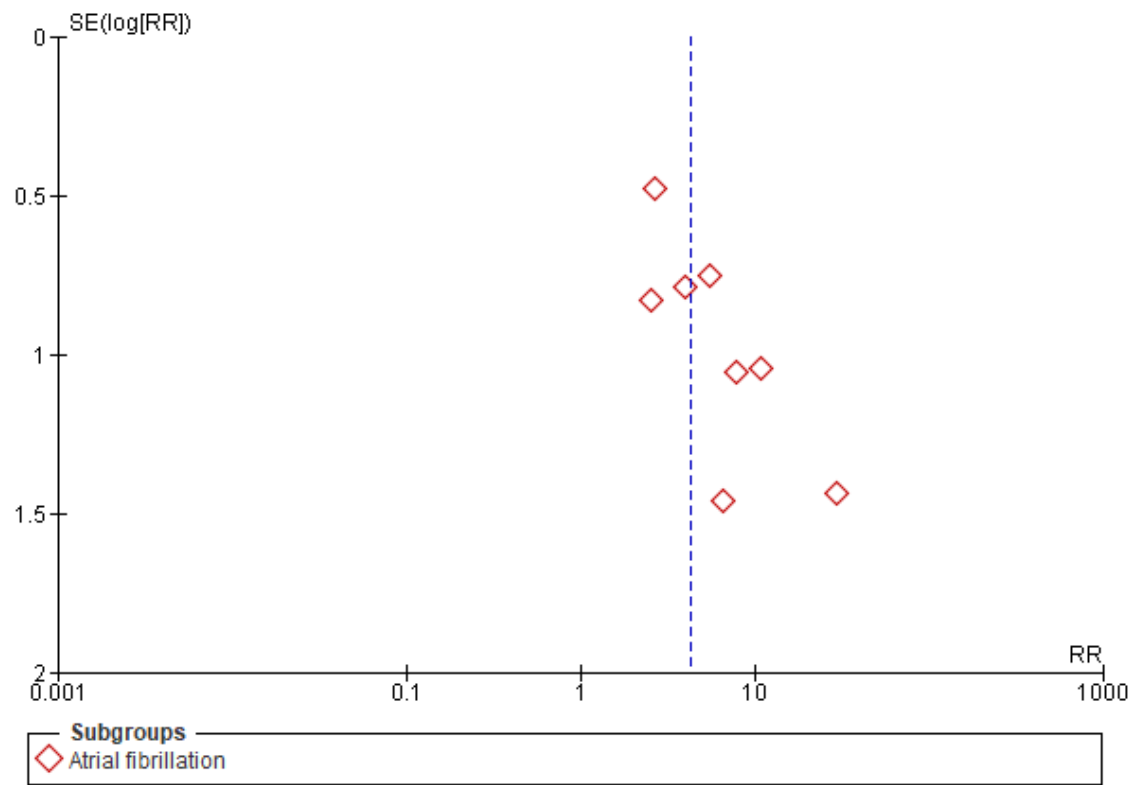

Figure C: Funnel plot for publication bias evaluation – atrial fibrillation.

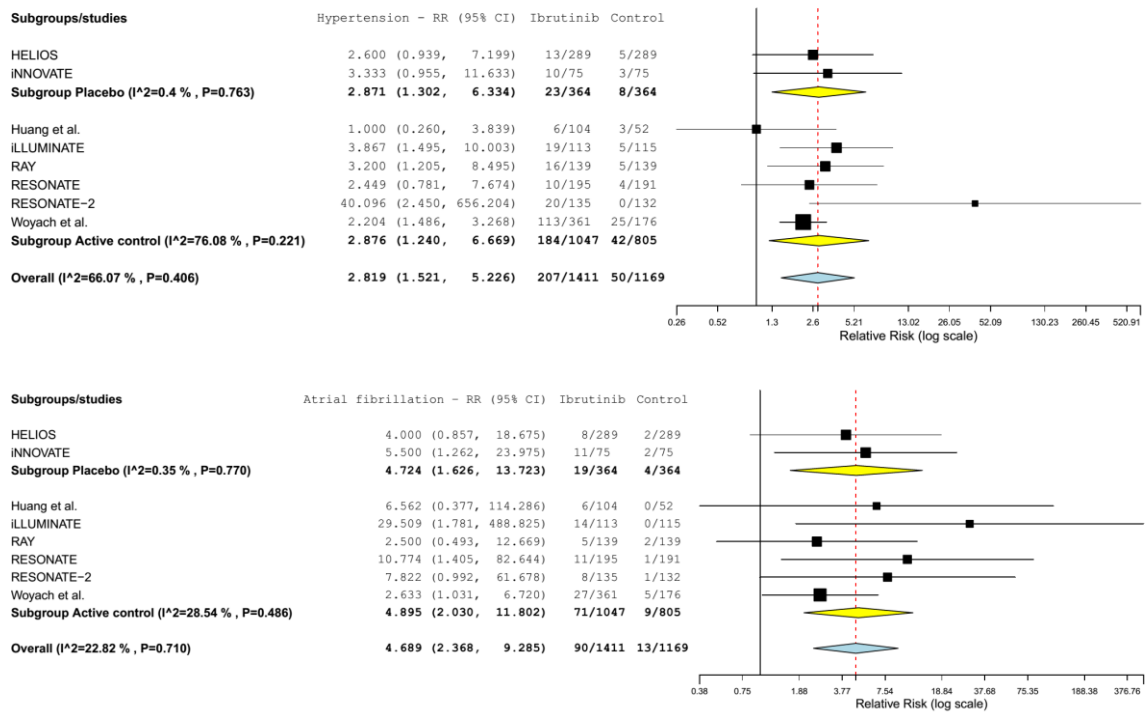

Figure D: Forest plot of risk associated with ibrutinib according to the controls used in the trials. P-value for interaction between groups regarding hypertension: p=0.99; P-value for interaction between groups regarding atrial fibrillation: p=0.96.

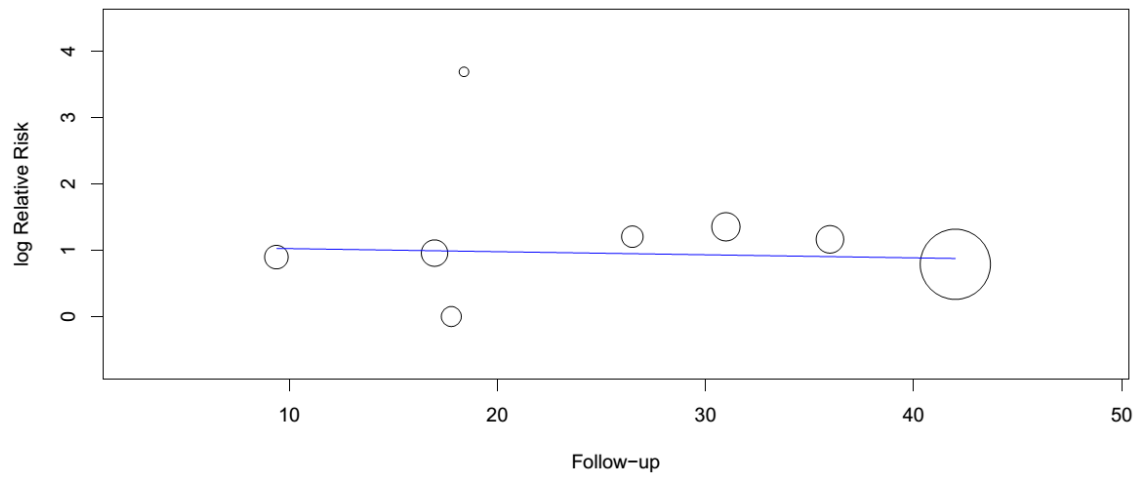

Figure E: Meta-regression evaluating the association of hypertension risk and follow-up ( $p=0.93$ ).



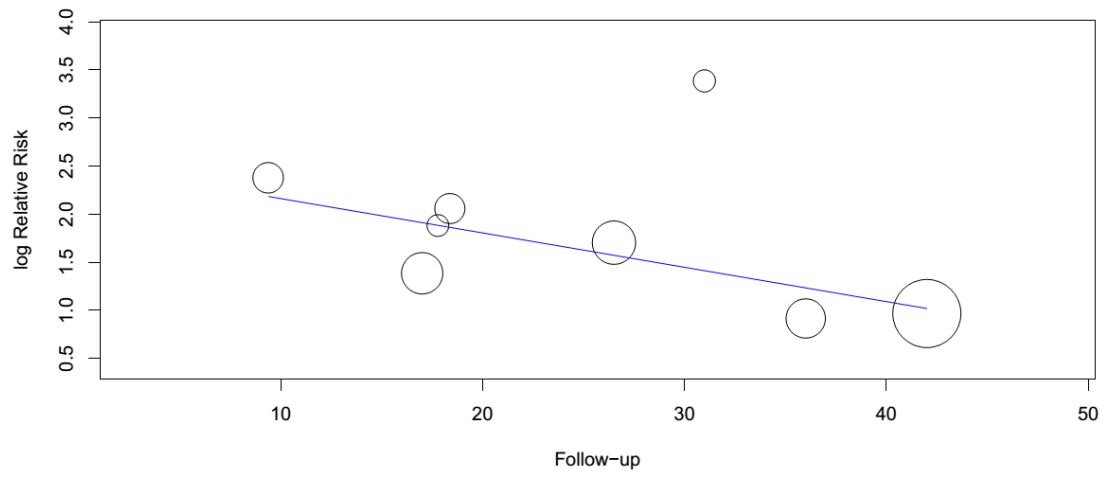

Figure F: Meta-regression evaluating the association of atrial fibrillation risk and follow-up ( $p=0.158$ ).

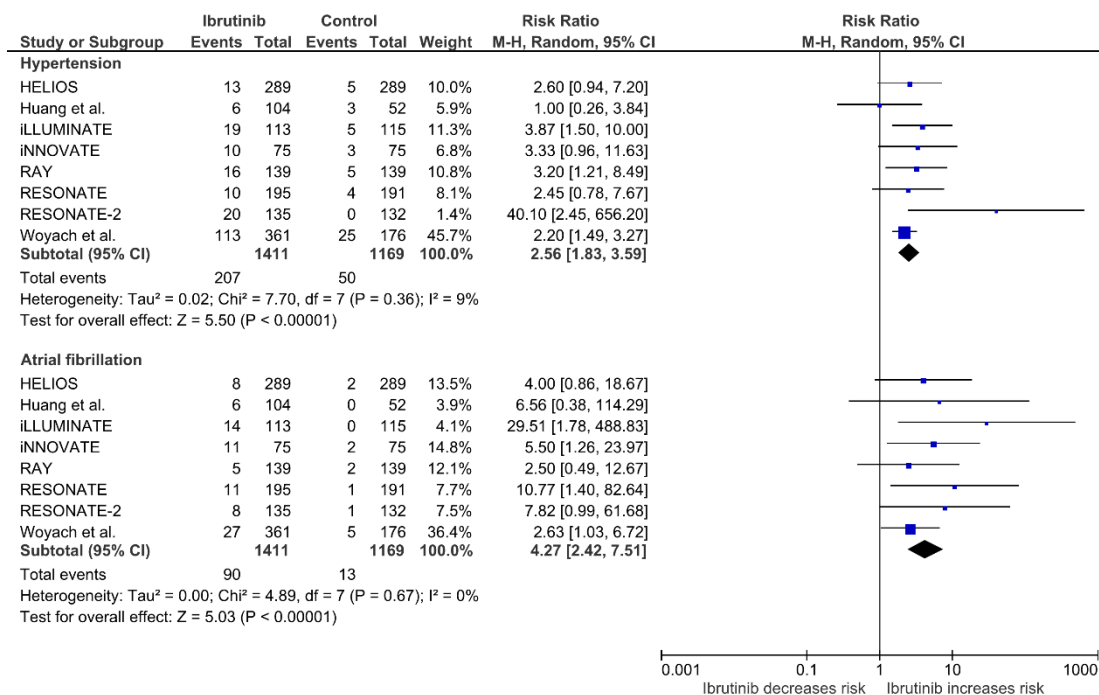

Figure G: Forest plot with meta-analyses using the Mantel-Haenszel method and random effects models.
